# Supplementary material for: Alternative polyadenylation transcriptome-wide association study identifies APA-linked susceptibility genes in brain disorders
Source: PubMed Central journal article supplement (PMC9898543; doi:10.1038/s41467-023-36311-8), 2023-02-03
Supplement: 41467_2023_36311_MOESM2_ESM.pdf [file 41467_2023_36311_MOESM2_ESM.pdf]

## **Description of Additional Supplementary Files**

**File Name:** Supplementary Data 1

**Description:** 3'aTWAS genes of 11 brain disorders.

**File Name:** Supplementary Data 2

**Description:** 3'aTWAS fine-mapping results of 11 brain disorders.

**File Name:** Supplementary Data 3

**Description:** 3'aQTLs fine-mapping results for significant 3'aTWAS genes of 11 brain disorders.
